# Supplementary material for: Peripapillary Vascular Density in Compressive Optic Neuropathy and Normal-Tension Glaucoma: A Severity-Controlled Comparison
Source: PubMed Central journal article supplement — Invest Ophthalmol Vis Sci. 2023 Sep 6;64(12):10. doi: 10.1167/iovs.64.12.10 (PMC10484018; doi:10.1167/iovs.64.12.10), 2023-09-06
Supplement: iovs-64-12-10_s001.pdf [file iovs-64-12-10_s001.pdf]

## Supplementary Materials

**Table S1. Comparison between CON and NTG for eyes with clock-hour involvement of 0–3 h**

| Diagnosis                                 | CON          | NTG          | <i>P</i>         |
|-------------------------------------------|--------------|--------------|------------------|
| Number of eyes                            | 26           | 54           |                  |
| Age (years)                               | 53.2 ± 12.5  | 54.0 ± 8.2   | 0.783            |
| Gender (male/female)                      | 16/10        | 25/29        | 0.268            |
| SE (D)                                    | -1.65 ± 2.82 | -2.23 ± 2.03 | 0.559            |
| IOP at examination (mmHg)                 | 15.3 ± 2.4   | 17.0 ± 7.4   | 0.081            |
| MD (dB)                                   | -2.14 ± 1.72 | -6.17 ± 4.62 | <b>&lt;0.001</b> |
| PSD (dB)                                  | 3.79 ± 2.32  | 10.50 ± 5.04 | <b>&lt;0.001</b> |
| <b>OCT</b>                                |              |              |                  |
| Average peripapillary RNFL thickness (um) | 84.2 ± 7.2   | 76.1 ± 8.0   | <b>&lt;0.001</b> |
| Superior                                  | 106.3 ± 10.1 | 101.3 ± 17.7 | 0.133            |
| Temporal                                  | 56.6 ± 10.2  | 63.6 ± 10.1  | <b>0.037</b>     |
| Inferior                                  | 111.7 ± 13.8 | 74.8 ± 15.1  | <b>&lt;0.001</b> |
| Nasal                                     | 62.4 ± 9.5   | 64.7 ± 9.4   | 0.386            |
| Average GCIPL thickness                   | 70.0 ± 4.5   | 46.6 ± 2.4   | 0.229            |
| Minimum GCIPL thickness                   | 60.9 ± 5.9   | 51.9 ± 5.1   | <b>&lt;0.001</b> |
| Sectoral GCIPL thicknesses                |              |              |                  |
| Superior                                  | 68.7 ± 5.7   | 77.1 ± 8.5   | <b>0.001</b>     |
| Superotemporal                            | 78.8 ± 7.2   | 73.8 ± 7.2   | <b>0.016</b>     |
| Inferotemporal                            | 82.6 ± 5.8   | 55.7 ± 7.3   | <b>&lt;0.001</b> |
| Inferior                                  | 69.5 ± 5.4   | 56.6 ± 6.1   | <b>0.001</b>     |
| Inferonasal                               | 59.3 ± 7.7   | 68.1 ± 7.6   | <b>0.001</b>     |
| Superonasal                               | 62.0 ± 8.8   | 80.5 ± 7.6   | <b>&lt;0.001</b> |
| <b>OCTA</b>                               |              |              |                  |
| Average peripapillary VD (%)              | 52.4 ± 4.2   | 55.4 ± 3.7   | <b>0.004</b>     |
| Superior                                  | 60.4 ± 7.2   | 63.0 ± 6.7   | 0.126            |
| Temporal                                  | 38.0 ± 5.8   | 52.0 ± 7.7   | <b>&lt;0.001</b> |
| Inferior                                  | 67.0 ± 8.1   | 52.7 ± 9.7   | <b>&lt;0.001</b> |
| Nasal                                     | 44.3 ± 6.8   | 53.9 ± 5.8   | <b>&lt;0.001</b> |
| Average macular VD                        | 46.6 ± 2.4   | 47.5 ± 3.0   | 0.292            |
| Superior                                  | 47.6 ± 2.6   | 49.4 ± 5.2   | 0.400            |
| Temporal                                  | 46.8 ± 2.6   | 46.5 ± 3.5   | 0.722            |
| Inferior                                  | 47.3 ± 3.2   | 46.2 ± 4.7   | 0.264            |
| Nasal                                     | 44.7 ± 3.5   | 47.7 ± 6.7   | 0.511            |

N/A, not applicable; SE, spherical equivalent; IOP, intraocular pressure; MD, mean deviation; PSD, pattern standard deviation; OCT, optical coherence tomography; GCIPL, ganglion cell inner plexiform layer; RNFL, retinal nerve fiber layer; OCTA, optical coherence tomography angiography; VD, vessel density.

*P* value was calculated using generalized estimation equation (GEE).

**Table S2. Comparison between CON and NTG for eyes with clock-hour involvement of 4–6 h**

| Diagnosis                                 | CON          | NTG           | <i>P</i>         |
|-------------------------------------------|--------------|---------------|------------------|
| Number of eyes                            | 12           | 16            |                  |
| Age (years)                               | 46.8 ± 12.3  | 50.4 ± 8.9    | 0.582            |
| Gender (male/female)                      | 11/14        | 7/9           | 0.989            |
| SE (D)                                    | -1.00 ± 1.27 | -3.18 ± 2.84  | 0.124            |
| IOP at examination (mmHg)                 | 17.0 ± 7.4   | 13.7 ± 3.3    | 0.094            |
| MD (dB)                                   | -6.82 ± 6.76 | -8.85 ± 5.00  | 0.136            |
| PSD (dB)                                  | -7.93 ± 6.96 | -11.97 ± 5.02 | <b>0.005</b>     |
| <b>OCT</b>                                |              |               |                  |
| Average peripapillary RNFL thickness (um) | 73.8 ± 4.6   | 67.3 ± 5.8    | <b>0.036</b>     |
| Superior                                  | 94.3 ± 16.1  | 83.9 ± 10.5   | 0.067            |
| Temporal                                  | 47.3 ± 8.6   | 57.2 ± 8.2    | <b>0.030</b>     |
| Inferior                                  | 95.9 ± 12.2  | 64.7 ± 10.0   | <b>&lt;0.001</b> |
| Nasal                                     | 57.8 ± 6.7   | 63.5 ± 8.1    | <b>0.024</b>     |
| Average GCIPL thickness                   | 64.7 ± 4.9   | 66.1 ± 4.9    | 0.371            |
| Minimum GCIPL thickness                   | 52.1 ± 8.2   | 50.4 ± 3.9    | 0.495            |
| Sectoral GCIPL thicknesses                |              |               |                  |
| Superior                                  | 63.3 ± 5.3   | 75.1 ± 9.8    | <b>0.011</b>     |
| Superotemporal                            | 76.5 ± 7.8   | 71.1 ± 6.9    | 0.121            |
| Inferotemporal                            | 78.5 ± 8.8   | 53.9 ± 5.0    | <b>&lt;0.001</b> |
| Inferior                                  | 66.2 ± 5.9   | 54.0 ± 5.4    | <b>0.005</b>     |
| Inferonasal                               | 53.4 ± 7.2   | 64.3 ± 7.5    | <b>0.001</b>     |
| Superonasal                               | 54.5 ± 7.8   | 77.8 ± 9.5    | <b>0.014</b>     |
| <b>OCTA</b>                               |              |               |                  |
| Average peripapillary VD (%)              | 51.3 ± 5.4   | 53.9 ± 4.0    | 0.131            |
| Superior                                  | 58.8 ± 9.3   | 60.9 ± 6.1    | 0.177            |
| Temporal                                  | 39.3 ± 5.6   | 54.9 ± 8.9    | <b>&lt;0.001</b> |
| Inferior                                  | 63.5 ± 8.8   | 46.4 ± 8.2    | <b>&lt;0.001</b> |
| Nasal                                     | 43.4 ± 5.9   | 53.5 ± 4.8    | <b>0.001</b>     |
| Average macular VD                        | 46.7 ± 2.8   | 46.6 ± 1.9    | 0.915            |
| Superior                                  | 47.6 ± 2.9   | 49.3 ± 4.1    | 0.198            |
| Temporal                                  | 46.7 ± 1.6   | 45.7 ± 3.5    | 0.213            |
| Inferior                                  | 47.8 ± 4.1   | 43.7 ± 3.6    | <b>0.011</b>     |
| Nasal                                     | 44.1 ± 4.5   | 47.9 ± 3.3    | <b>0.025</b>     |

N/A, not applicable; SE, spherical equivalent; IOP, intraocular pressure; MD, mean deviation; PSD, pattern standard deviation; OCT, optical coherence tomography; GCIPL, ganglion cell inner plexiform layer; RNFL, retinal nerve fiber layer; OCTA, optical coherence tomography angiography; VD, vessel density.

*P* value was calculated using generalized estimation equation (GEE).
